# Supplementary material for: Modulation by Ozone of Glucocorticoid-Regulating Factors in the Lungs in Relation to Stress Axis Reactivity
Source: MDPI journal article supplement (doi:10.3390/toxics9110290), 2021-11-03
Supplement: s1 [file s1]

# Supplementary Materials: Modulation by ozone of glucocorticoid-regulating factors in the lungs in relation to stress axis reactivity

Jith Thomas and Errol M. Thomson

**Table S1.** Gene-specific primer sequences for the quantitative real-time PCR used in this study.

| Gene  |   | Primer                   | Accession Number |
|-------|---|--------------------------|------------------|
| ACTIN | L | ctggctcctagcaccatga      | NM_031144.2      |
|       | R | tagagccaccaatccacaca     |                  |
| IL1A  | L | aagagacggctaagttcaatca   | NM_017019.1      |
|       | R | tgatctgggttgatggtct      |                  |
| CXCL2 | L | gtccaaaagataactgaacaaggc | NM_053647.1      |
|       | R | ggtgaggtacaggagcccat     |                  |
| CCL3  | L | gcaccctctgttacctgctc     | NM_013025.2      |
|       | R | taggagaagcagcaggcagt     |                  |
| TNF   | L | cgtagcccacgtcgtagc       | NM_012675.3      |
|       | R | ggttgctcttgagatccatgc    |                  |
| GR    | L | aactggaataggtgccaagg     | NM_012576.2      |
|       | R | ggtctcattccagggttg       |                  |
| HSDB1 | L | cctcagctatgtggtcctgag    | NM_017080.2      |
|       | R | cagaggttgggtcattttcc     |                  |
| HSDB2 | L | cgtcactcaaggggacgtat     | NM_017081.1      |
|       | R | aggggtatggcatgtctcc      |                  |
| MCR   | L | caagctggcatgaacttagga    | NM_013131.1      |
|       | R | tcctcgtggaggccttt        |                  |

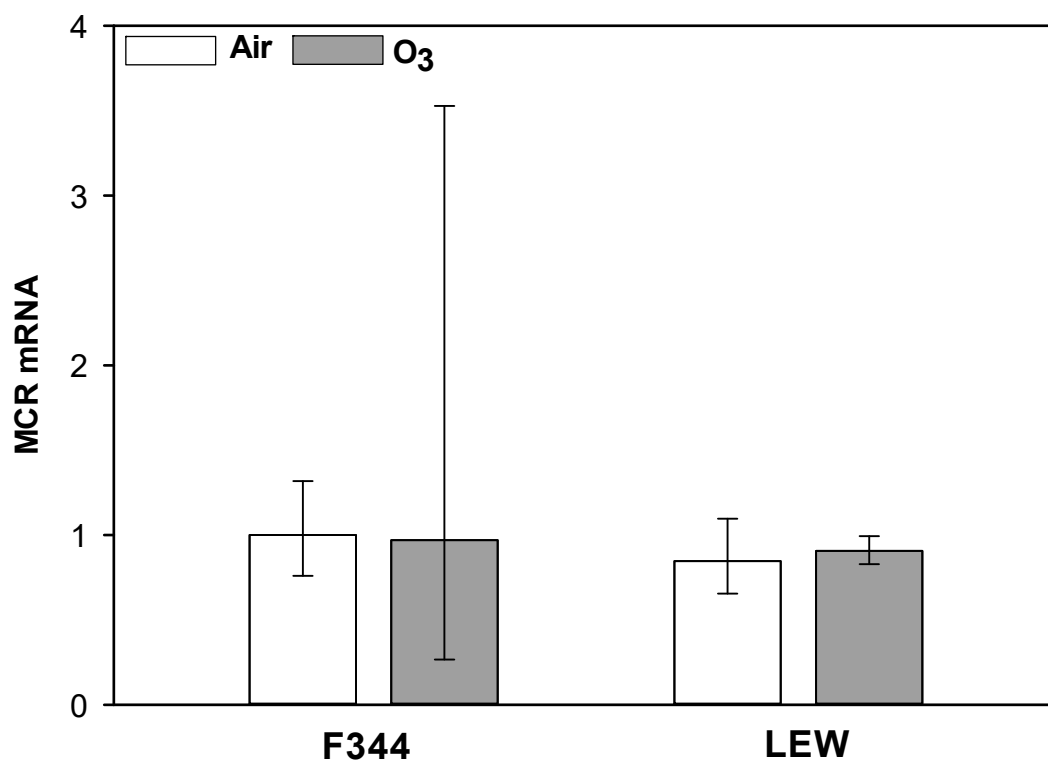

**Figure S1.** Expression of a glucocorticoid-regulating gene (mineralocorticoid receptor; MCR) in lung tissue of Fischer (F344) and Lewis (LEW) rats after exposure to air or 0.8 ppm ozone (O<sub>3</sub>) for 4 h. Real-time PCR results are expressed as geometric mean of fold-change relative to the F344 air control  $\pm$  95% confidence intervals.
